# Supplementary material for: Sexy Mouth Odour? Male Oral Gland Pheromone in the Grain Beetle Parasitoid Lariophagus distinguendus (Förster) (Hymenoptera: Pteromalidae)
Source: Biomed Res Int. 2015 Oct 22;2015:216952. doi: 10.1155/2015/216952 (PMC4633539; doi:10.1155/2015/216952)
Supplement: Supplementary file 1 — Figure S1: Setup for the experiment to test the volatility of a putative pheromone when the two couples were placed in direct neighbourhood to each other. Video S1: Circular movement of male's antennae. Video S2: Bending female antennae out of the V-shape by males antennal stroking behaviour. Video S3: Contact between male's mandibular or labial palps and females antennae. [file 216952.f1.zip]

Archive with 5 entries (4 files):
- 216952.f1/
- 216952.f1/Supplementary Figure S1.docx
- 216952.f1/Supplementary Video 1.wmv
- 216952.f1/Supplementary Video 2.wmv
- 216952.f1/Supplementary Video 3.wmv
